# Supplementary material for: The Case for Whole-Person Integrative Care
Source: MDPI journal article supplement (doi:10.3390/medicina57070677), 2021-06-30
Supplement: s1 [file s1]

Table S1: Studies included in narrative review

|   | Study                          | Model type                                                           | Program                                                      | Type of Study                                                             | Aim                                                                                    | Outcome measure                                                                                                                                                                                                                                                         |
|---|--------------------------------|----------------------------------------------------------------------|--------------------------------------------------------------|---------------------------------------------------------------------------|----------------------------------------------------------------------------------------|-------------------------------------------------------------------------------------------------------------------------------------------------------------------------------------------------------------------------------------------------------------------------|
| 1 | Bokhour, B., et al (2020).     | Whole Health                                                         | VA System                                                    | Mixed method evaluation                                                   | Better Health, Lower cost, Improved Provider experience, Improved patient satisfaction | Improvements in self-reported wellbeing and quality of life, perceived stress, ability to manage chronic pain, decreased use of opioids, higher ratings of patient centered care, improved Whole Health employees satisfaction with less burnout, less likely to resign |
| 2 | Brooks, A.J., et al (2020).    | Integrative Health Training                                          | Foundations in Integrative Health                            | Survey of participants completing 32 hour course                          | Improved Provider experience                                                           | Improved resilience, wellness behaviors                                                                                                                                                                                                                                 |
| 3 | Budzowski, A.R., et al (2019). | Health Coaching                                                      | UPMC health plan                                             | Case series 5 lifestyle programs health plan members, no comparison group | Health outcomes                                                                        | Reduced stress, increase physical activity, improvements in nutrition, increased weight loss                                                                                                                                                                            |
| 4 | Crawford, P.F, et al (2019).   | Evidence based Non-pharmacologic intervention (Acupuncture) training | Attendees of Uniformed Services Academy of Family Physicians | Conference survey of all participants                                     | Improved Provider experience                                                           | Reduced depersonalization of patients for those with acupuncture training                                                                                                                                                                                               |

|   |                               |                           |                                                                     |                                                    |                                                                            |                                                                                                                                                                                              |
|---|-------------------------------|---------------------------|---------------------------------------------------------------------|----------------------------------------------------|----------------------------------------------------------------------------|----------------------------------------------------------------------------------------------------------------------------------------------------------------------------------------------|
| 5 | Crocker, R.L., et al (2017).  | Whole Person Primary Care | University of Arizona                                               | Fidelity study, random sampling of clinic patients | Improved patient experience                                                | Patient satisfaction, high empathy scores, patient satisfaction and likelihood to recommend program to others                                                                                |
| 6 | Crocker, R.L., et al (2019).  | Whole Person Primary Care | University of Arizona                                               | Real world observation study, pre- and post-survey | Better Health                                                              | Improvements in health related quality of life, work productivity, overall wellbeing, mental health measures, improved sleep, improved nutrition, improved physical activity, decreased pain |
| 7 | De Marchis, E., et al (2019). | Social care program       | Ambulatory primary care applicants for ABFM continued certification | Cross-sectional survey analysis                    | Improved Provider experience                                               | Less burnout                                                                                                                                                                                 |
| 8 | Eby, D. (2016).               | Relationship based care   | Southcentral Foundation                                             | QI analysis                                        | Better health, Improved Patient Satisfaction, Improved Provider experience | Improved HEDIS measures, improved satisfaction with overall care and shared decision making, decreased employee turnover                                                                     |

|    |                                   |                           |                                                    |                                                                             |                                              |                                                                                                                                                                               |
|----|-----------------------------------|---------------------------|----------------------------------------------------|-----------------------------------------------------------------------------|----------------------------------------------|-------------------------------------------------------------------------------------------------------------------------------------------------------------------------------|
| 9  | Gaudet, T. and Kligler, B (2019). | Whole Health              | VA health system                                   | Commentary                                                                  |                                              |                                                                                                                                                                               |
| 10 | Herman, W.H., et al (2005)        | Lifestyle program         | National Diabetes Prevention Program               | Cost-effectiveness analysis                                                 | Better Health, Lower costs                   | Delay and reduced incidence of diabetes cost effectiveness                                                                                                                    |
| 11 | Jonk, Y., et al (2015).           | Health coaching           |                                                    | Case controlled claims data analysis                                        | Lower cost                                   | Reduced outpatient and total medical expenditures                                                                                                                             |
| 12 | Leinenkugel, J., et al (2020).    | Whole Health              | VA System                                          | VA System medical cost data before and after implementation of Whole Health | Reduced Cost                                 | Decreased cost of total care, decrease pharmaceutical costs, Recommendation to transform VA healthcare delivery to person-centered, relationship based, recovery focused care |
| 13 | McCaffrey, A.M., et al (2007).    | Whole person Primary Care | Marino Center, Cambridge, MA                       | Focus group                                                                 | Improved Patient Satisfaction                | Satisfaction with IM providers, Dissatisfaction with conventional medicine                                                                                                    |
| 14 | Myklebust, M., et al (2008).      | Whole Person Primary Care | University of Michigan Integrative Medicine Clinic | Prospective patient survey study                                            | Improved Patient satisfaction, Better Health | Improved holistic health quality, improved SF-12 scores and improved patient satisfaction                                                                                     |

|    |                                            |                           |                                                                                                                 |                                                                                                              |                           |                                                                                     |
|----|--------------------------------------------|---------------------------|-----------------------------------------------------------------------------------------------------------------|--------------------------------------------------------------------------------------------------------------|---------------------------|-------------------------------------------------------------------------------------|
| 15 | Orme-Johnson, D.W. and Herron, R.E (1997). | Multicomponent program    |                                                                                                                 | Retrospective study with health plan claims                                                                  | Lower costs               | Reduced total medical expenditures, lower hospital utilization                      |
| 16 | Ornish, D (1998).                          | Multicomponent program    |                                                                                                                 | Multicenter study lifestyle versus control revascularization surgery                                         | Better Health, Lower cost | Cost savings<br>Reduced Angina                                                      |
| 17 | Pruitt, Z., et al (2018).                  | Social care program       | WellCare                                                                                                        | Claims data analysis                                                                                         | Lower cost                | Reduced medical cost                                                                |
| 18 | Sarnat, R.L. and Winterstein, J. (2004).   | Whole Person Primary Care | Integrative Medicine IPA in Chicago, IL (PCP are Doctors of Chiropractic)                                       | Analysis of clinical and cost outcomes using claims data                                                     | Lower costs               | Fewer hospital admission, hospital stays, outpatient costs and pharmaceutical costs |
| 19 | Sarnat RL, and Winterstein J. (2007).      | Whole Person Primary Care | Integrative Medicine IPA in Chicago, IL (PCP are Doctors of Chiropractic, Integrative M.D. and D.O. physicians) | Analysis of clinical and cost outcomes using claims data                                                     | Lower costs               | Fewer hospital admission, hospital stays, outpatient costs and pharmaceutical costs |
| 20 | Thom, D.H., et al (2015).                  | Health Coaching           | "Safety-net" health center in San Francisco                                                                     | Non-blinded RCT health coaching versus usual care for patients with diabetes, hypertension or hyperlipidemia | Better Health             | Improved medication adherence                                                       |
| 21 | Wolever, R.Q., et al (2010).               | Health Coaching           | Duke University Integrative Medicine                                                                            | RCT telephone health coaching or usual care                                                                  | Better health             | Improved medication adherence, Improved self-reported                               |

|  |  |  |  |  |  |                                        |
|--|--|--|--|--|--|----------------------------------------|
|  |  |  |  |  |  | health, and<br>improvement<br>s in A1c |
|--|--|--|--|--|--|----------------------------------------|
